# Supplementary material for: Development and prospective multicenter evaluation of the long noncoding RNA MALAT-1 as a diagnostic urinary biomarker for prostate cancer
Source: PubMed Central journal article supplement (PMC4294360; doi:10.18632/oncotarget.2691), 2014-11-04
Supplement: oncotarget-05-11091-s001.pdf [file oncotarget-05-11091-s001.pdf]

# Development and prospective multicenter evaluation of the long noncoding RNA MALAT-1 as a diagnostic urinary biomarker for prostate cancer

## Supplementary Material

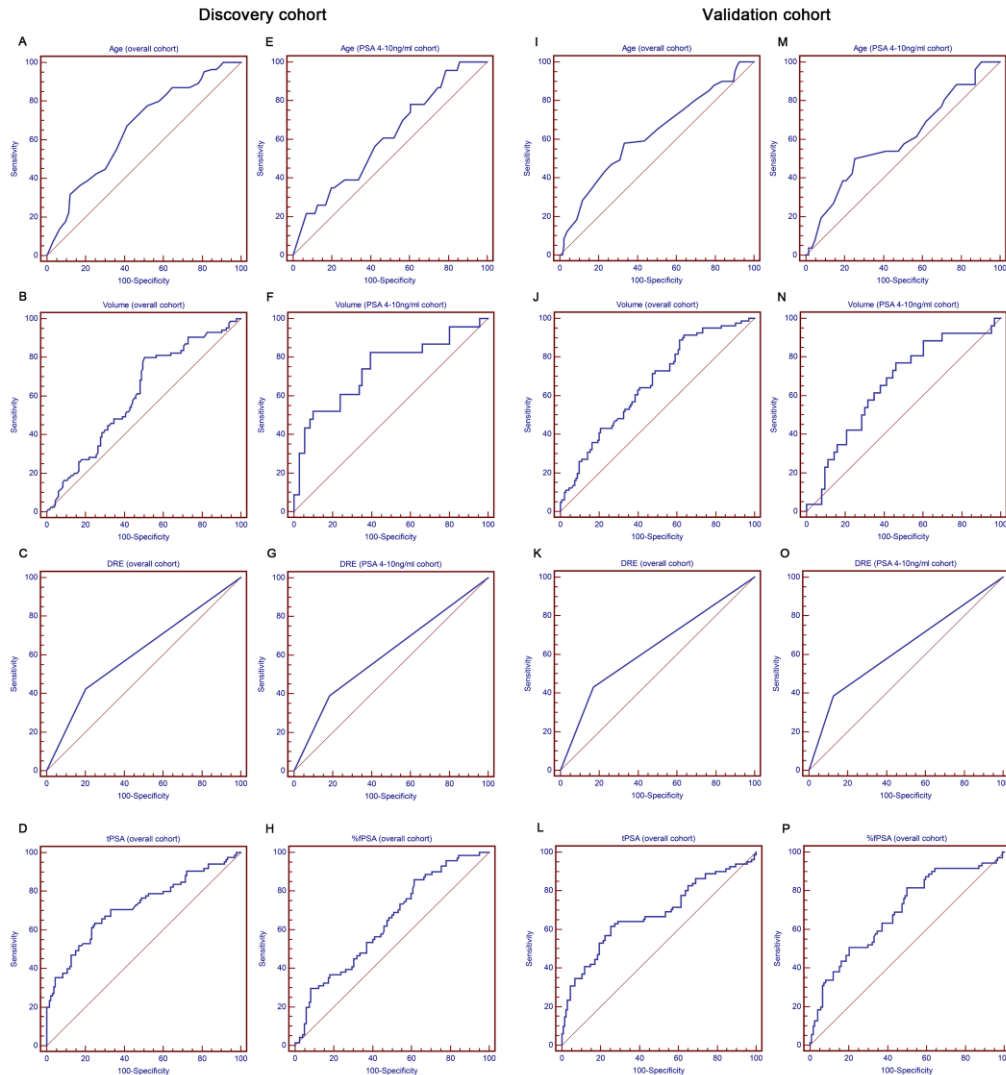

**Supplemental Figure 1:** Receiver operating characteristic curve analysis for evaluating the diagnostic performance of (A) age, (B) volume (C) DRE, (D) tPSA, (H) %fPSA in the overall cohort in the discovery phase; (E) age, (F) volume (G) DRE in the PSA 4-10 ng/ml cohort in the discovery phase; (I) age, (J) volume (K) DRE, (L) tPSA, (P) %fPSA in the overall cohort in the validation phase; (M) age, (N) volume (O) DRE in the PSA 4-10 ng/ml cohort in the validation phase. PSA=prostate-specific antigen; tPSA=total PSA; %fPSA=percent free PSA; DRE=digital rectal examination.

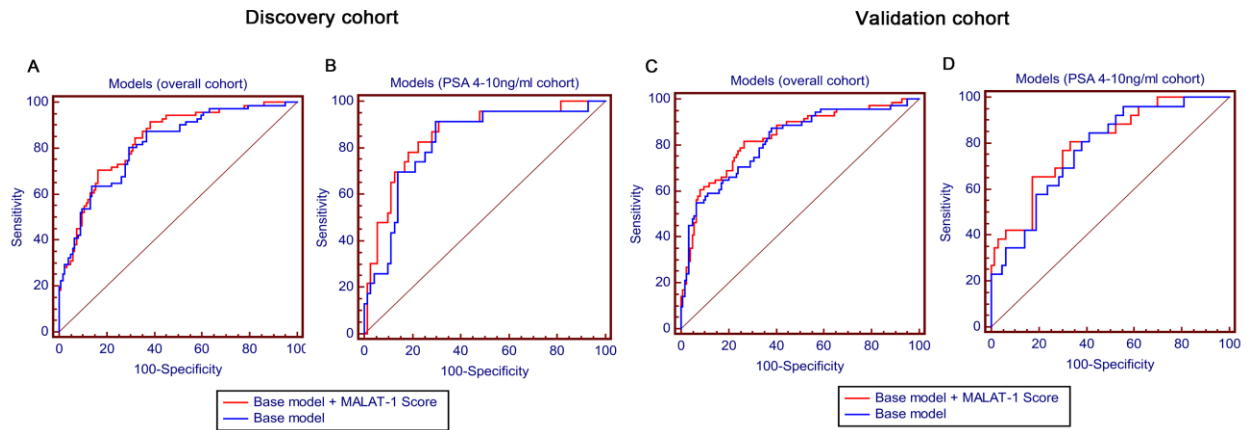

**Supplemental Figure 2:** Comparison of the diagnostic performance of the base model and the base model plus MALAT-1 in the overall cohort in the (A) discovery phase and (C) validation phase and in the PSA 4-10 ng/ml cohort in the (B) discovery phase and (D) validation phase. The base model in the overall cohort includes age, volume, %fPSA, tPSA and DRE; the base model in the PSA 4-10 ng/ml cohort includes age, volume, %fPSA and DRE.

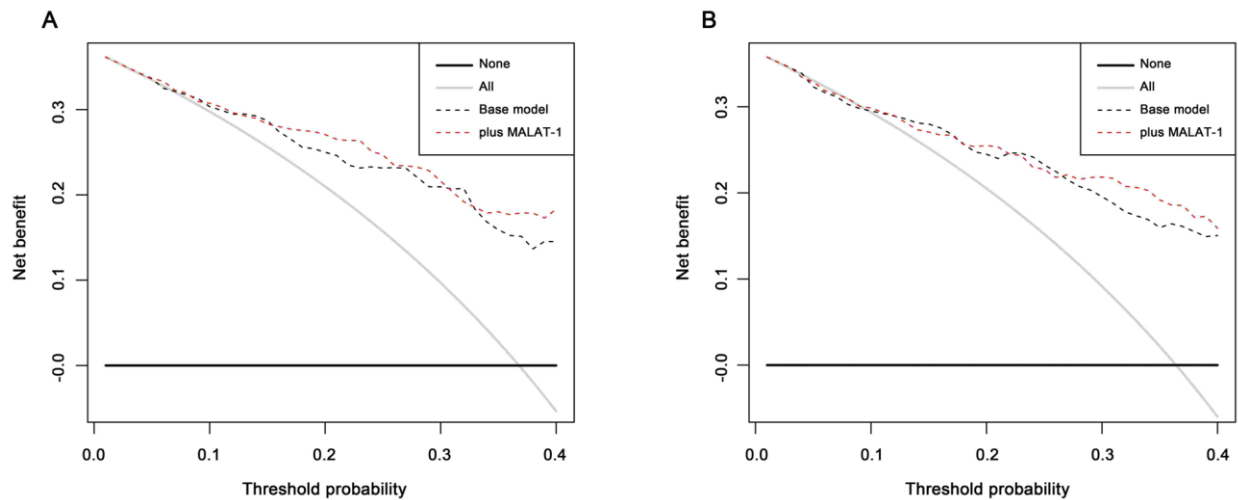

**Supplemental Figure 3:** Decision curve analysis for positive biopsy prediction in the overall cohort by the base model (base model includes age, volume, %fPSA, tPSA and DRE) in the (A) discovery phase and (B) validation phase. The dashed black line indicates the base model that includes age, volume, %fPSA and DRE; the solid black line shows the prediction model that includes only age, PSA level, DRE result, and prostate volume. The horizontal line along the x-axis assumes that no patient will have PCa (no patient should undergo a prostate biopsy), whereas the solid gray line assumes that all patients will have PCa (all patients will need to undergo a prostate biopsy).

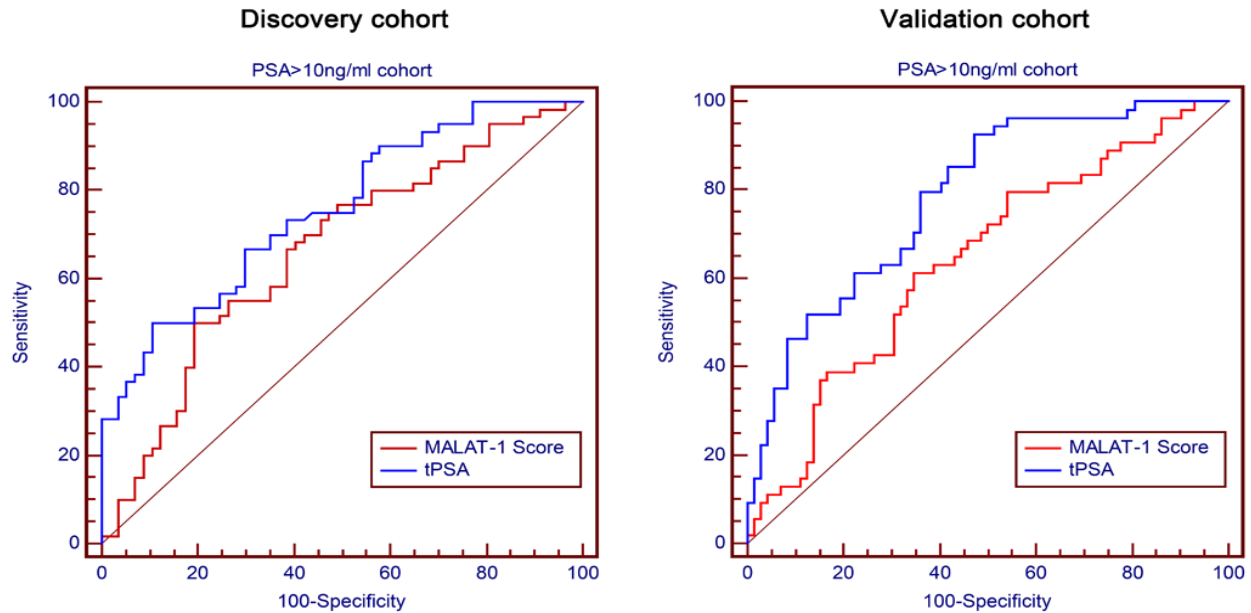

**Supplemental Figure 4:** Receiver operating characteristic curve analysis for evaluating the diagnostic performance of the MALAT-1 score and PSA in the PSA>10 ng/ml cohort. Comparison of the area under the curve (AUC) of the MALAT-1 score and PSA in the PSA>10 ng/ml cohort in the (A) discovery phase and (B) validation phase.

**Supplemental table 1: Co-relationship between MALAT-1 and clinical variables**

| Variables | MALAT-1 Score at Discovery phase |                             | MALAT-1 Score at Validation phase |                             |
|-----------|----------------------------------|-----------------------------|-----------------------------------|-----------------------------|
|           | Correlation Coefficient          | <i>p</i> value <sup>†</sup> | Correlation Coefficient           | <i>p</i> value <sup>†</sup> |
| Age       | 0.069                            | 0.311                       | 0.079                             | 0.249                       |
| tPSA      | 0.096                            | 0.158                       | 0.128                             | 0.052                       |
| Volume    | 0.027                            | 0.693                       | -0.061                            | 0.375                       |
| %fPSA     | -0.084                           | 0.218                       | -0.032                            | 0.643                       |
| DRE       | -0.014                           | 0.833                       | 0.023                             | 0.741                       |
| GS        | -0.006                           | 0.959                       | 0.089                             | 0.431                       |

MALAT-1 = metastasis associated in lung adenocarcinoma transcript 1; PSA = prostate-specific antigen; tPSA = total PSA; %fPSA = percent free PSA; DRE = digital rectal examination; GS = Gleason Score.

<sup>†</sup>Spearman rank correlation test.

**Supplemental table 2: Comparison ROC curves between MALAT-1 and clinical variables**

| Variables | MALAT-1 Score at Discovery phase |                      |                           |                      | MALAT-1 Score at Validation phase |                      |                          |                      |
|-----------|----------------------------------|----------------------|---------------------------|----------------------|-----------------------------------|----------------------|--------------------------|----------------------|
|           | Overall Cohort                   |                      | PSA 4-10ng/ml Cohort      |                      | Overall Cohort                    |                      | PSA 4-10ng/ml Cohort     |                      |
|           | AUC Difference (95%CI)           | p value <sup>Δ</sup> | AUC Difference (95%CI)    | p value <sup>Δ</sup> | AUC Difference (95%CI)            | p value <sup>Δ</sup> | AUC Difference (95%CI)   | p value <sup>Δ</sup> |
| Age       | 0.0295<br>(-0.0748-0.134)        | 0.579                | 0.131<br>(-0.0427-0.305)  | 0.139                | 0.0364<br>(-0.0716-0.144)         | 0.509                | 0.0693<br>(-0.110-0.249) | 0.449                |
| tPSA      | 0.0331<br>(-0.0654-0.132)        | 0.510                | 0.197<br>(0.0151-0.379)   | 0.034                | 0.0190<br>(-0.0868 to 0.125)      | 0.725                | 0.0684<br>(-0.116-0.253) | 0.467                |
| Volume    | 0.0801<br>(-0.0226-0.183)        | 0.126                | 0.00367<br>(0.0151-0.379) | 0.964                | 0.000503<br>(-0.103-0.104)        | 0.992                | 0.0110<br>(-0.163-0.185) | 0.901                |
| %fPSA     | 0.0515<br>(-0.0573- 0.160)       | 0.353                | 0.120<br>(-0.0549-0.295)  | 0.179                | 0.0444<br>(-0.0624-0.151)         | 0.415                | 0.0424<br>(-0.120-0.205) | 0.608                |
| DRE       | 0.0774<br>(-0.0256-0.181)        | 0.141                | 0.137<br>(-0.0395-0.314)  | 0.128                | 0.0303<br>(-0.0750-0.136)         | 0.573                | 0.0409<br>(-0.135-0.217) | 0.648                |

ROC = receiver operating characteristic; MALAT-1 = metastasis associated in lung adenocarcinoma transcript 1; AUC = area under the ROC curve; PSA = prostate-specific antigen; tPSA = total PSA; %fPSA = percent free PSA; DRE = digital rectal examination; GS = Gleason Score.

<sup>Δ</sup> Z-Test.

**Supplemental table 3: Net benefit and net reduction in avoidable biopsies for the base model and Base model plus MALAT-1 compared to the “treat all” strategy to biopsy every patient for different threshold probabilities in the same range for the overall cohort.**

|                  |                                     | Threshold probability (%)            | 10     | 15     | 20     | 25     | 30     | 35     | 40     |
|------------------|-------------------------------------|--------------------------------------|--------|--------|--------|--------|--------|--------|--------|
| Discovery Phase  | Net benefit                         | Base model <sup>‡</sup>              | 30.340 | 28.711 | 20.984 | 23.143 | 20.947 | 15.903 | 14.508 |
|                  |                                     | Base model <sup>‡</sup> plus MALAT-1 | 30.743 | 28.315 | 25.000 | 24.698 | 21.614 | 18.015 | 18.307 |
|                  |                                     | Treat all                            | 29.764 | 25.632 | 27.073 | 15.717 | 9.697  | 2.750  | -5.354 |
| Validation Phase | Net reduction in avoidable biopsies | Base model <sup>‡</sup>              | 5.181  | 17.444 | 16.062 | 22.280 | 26.252 | 24.426 | 29.793 |
|                  |                                     | Base model <sup>‡</sup> plus MALAT-1 | 8.808  | 15.199 | 24.352 | 26.943 | 27.807 | 28.349 | 35.492 |
|                  |                                     | Base model <sup>‡</sup>              | 29.516 | 27.994 | 24.487 | 23.248 | 19.560 | 15.976 | 15.043 |
| Validation Phase | Net benefit                         | Base model <sup>‡</sup> plus MALAT-1 | 29.858 | 27.059 | 25.513 | 22.735 | 21.832 | 19.172 | 15.897 |
|                  |                                     | Treat all                            | 29.345 | 25.189 | 20.513 | 15.214 | 9.158  | 2.170  | -5.983 |
|                  |                                     | Base model <sup>‡</sup>              | 1.538  | 15.897 | 15.897 | 24.103 | 24.274 | 25.641 | 31.538 |
| Validation Phase | Net reduction in avoidable biopsies | Base model <sup>‡</sup> plus MALAT-1 | 4.615  | 10.598 | 20.000 | 22.564 | 29.573 | 31.575 | 32.821 |

MALAT-1 = metastasis associated in lung adenocarcinoma transcript 1. PSA = prostate-specific antigen; tPSA = total PSA; %fPSA = percent free PSA; DRE = digital rectal examination;

<sup>‡</sup>The base model consisted of age, tPSA, volume, %fPSA and DRE.

**Supplemental table 4: Number of total and high-grade (defined as Gleason  $\geq$  7) PCa missed and reduction in biopsies according to threshold probability in the range of 10-40% for the base model and base model plus MALAT-1 for patients of the overall cohort.**

|                  | Probability cut-off, % | Model                            | Cancers missed, No. (%) | High-grade cancer missed, No. (%) | Unnecessary Biopsies spared, No. (%) |
|------------------|------------------------|----------------------------------|-------------------------|-----------------------------------|--------------------------------------|
| Discovery Phase  | 15                     | Base model <sup>†</sup>          | 1(1.4%)                 | 0                                 | 20(16.4%)                            |
|                  |                        | Base model <sup>†</sup> + MALAT1 | 1(1.4%)                 | 0                                 | 18(14.8%)                            |
|                  | 20                     | Base model <sup>†</sup>          | 1(1.4%)                 | 0                                 | 19(15.6%)                            |
|                  |                        | Base model <sup>†</sup> + MALAT1 | 2(2.8%)                 | 0                                 | 28(23.0%)                            |
|                  | 25                     | Base model <sup>†</sup>          | 2(2.8%)                 | 0                                 | 25(20.5%)                            |
|                  |                        | Base model <sup>†</sup> + MALAT1 | 2(2.8%)                 | 0                                 | 31(25.4%)                            |
|                  | 30                     | Base model <sup>†</sup>          | 2(2.8%)                 | 0                                 | 28(23.0%)                            |
|                  |                        | Base model <sup>†</sup> + MALAT1 | 2(2.8%)                 | 0                                 | 32(26.2%)                            |
|                  | 35                     | Base model <sup>†</sup>          | 2(2.8%)                 | 0                                 | 30(24.6%)                            |
|                  |                        | Base model <sup>†</sup> + MALAT1 | 2(2.8%)                 | 0                                 | 33(27.0%)                            |
|                  | 40                     | Base model <sup>†</sup>          | 2(2.8%)                 | 0                                 | 34(27.9%)                            |
|                  |                        | Base model <sup>†</sup> + MALAT1 | 2(2.8%)                 | 0                                 | 38(31.1%)                            |
| Validation Phase | 15                     | Base model <sup>†</sup>          | 2(2.8%)                 | 1(1.4%)                           | 18 (14.5%)                           |
|                  |                        | Base model <sup>†</sup> + MALAT1 | 0                       | 0                                 | 13(10.48%)                           |
|                  | 20                     | Base model <sup>†</sup>          | 2(2.8%)                 | 1(1.4%)                           | 18 (14.5%)                           |
|                  |                        | Base model <sup>†</sup> + MALAT1 | 1(1.4%)                 | 0                                 | 24(19.4%)                            |
|                  | 25                     | Base model <sup>†</sup>          | 2(2.8%)                 | 1(1.4%)                           | 28(22.6%)                            |
|                  |                        | Base model <sup>†</sup> + MALAT1 | 1(1.4%)                 | 0                                 | 28(22.6%)                            |
|                  | 30                     | Base model <sup>†</sup>          | 2(2.8%)                 | 1(1.4%)                           | 28(23.0%)                            |
|                  |                        | Base model <sup>†</sup> + MALAT1 | 2(2.8%)                 | 1(1.4%)                           | 35(28.2%)                            |
|                  | 35                     | Base model <sup>†</sup>          | 2(2.8%)                 | 1(1.4%)                           | 30(24.2%)                            |
|                  |                        | Base model <sup>†</sup> + MALAT1 | 2(2.8%)                 | 1(1.4%)                           | 37(29.8%)                            |
|                  | 40                     | Base model <sup>†</sup>          | 2(2.8%)                 | 1(1.4%)                           | 37(29.8%)                            |
|                  |                        | Base model <sup>†</sup> + MALAT1 | 2(2.8%)                 | 1(1.4%)                           | 39(31.5%)                            |

PCa = prostate cancer; MALAT-1 = metastasis associated in lung adenocarcinoma transcript 1; PSA = prostate-specific antigen; tPSA = total PSA; %fPSA = percent free PSA; DRE = digital rectal examination;

<sup>†</sup>The Base model consisted of age, tPSA, volume, %fPSA and DRE.
